# Supplementary material for: Challenge Non-Communicable Diseases Programs in Iran: A Qualitative Study
Source: Research Square preprint supplement (doi:10.21203/rs.3.rs-605318/v1), 2021-06-11
Supplement: Supplementary file 1 [file 04b8e0778f738bca84c3fdd4.docx]

**Consolidated criteria for reporting qualitative studies (COREQ): 32-item checklist**

| **Item No.** | **Topic** | **Guide Questions/Description** | **Reported on Page No.** |
| --- | --- | --- | --- |
| **Domain 1: Research team and reflexivity** | | | |
| **Personal characteristics** | | | |
| **1** | **Interviewer/facilitator** | **Which author/s conducted the interview or focus group?** | **the interview** |
| **2** | **Credentials** | **What were the researcher’s credentials? E.g. PhD, MD** | **PhD** |
| **3** | **Occupation** | **What was their occupation at the time of the study?** | **specialization in field of non-communicable diseases, executive work experience, research and training in this field** |
| **4** | **Gender** | **Was the researcher male or female?** | **male and female** |
| **5** | **Experience and training** | **What experience or training did the researcher have?** | **ethical issues were respected and learning interview techniques** |
| **relationship with participants** | | | |
| **6** | **Relationship established** | **Was a relationship established prior to study commencement?** | **no** |
| **7** | **Participant knowledge of the interviewer** | **What did the participants know about the researcher? e.g. personal goals, reasons for doing the research** | **goals, reasons for doing the research** |
| **8** | **Interviewer characteristics** | **characteristics were reported about the inter viewer/facilitator? e.g. Bias, assumptions, reasons and interests in the research topic** | **reasons and interests in the research topic** |
| **Domain 2: Study design** | | | |
| **Theoretical framework** | | | |
| **9** | **Methodological orientation and Theory** | **methodological orientation was stated to underpin the study? e.g. grounded theory, discourse analysis, ethnography, phenomenology, content analysis** | **content analysis** |
| **Participant selection** | | | |
| **10** | **Sampling** | **How were participants selected? e.g. purposive, convenience, consecutive, snowball** | **snowball** |
| **11** | **Method of approach** | **How were participants approached? e.g. face-to-face, telephone, mail, email** | **face-to-face** |
| **12** | **Sample size** | **How many participants were in the study?** | **40** |
| **13** | **Non-participation** | **Many people refused to participate or dropped out? Reasons?** | **0** |
| **Setting** | | | |
| **14** | **Setting of data collection** | **Where was the data collected? e.g. home, clinic, workplace** | **workplace** |
| **15** | **Presence of non-participants** | **Was anyone else present besides the participants and researchers?** | **no** |
| **16** | **Description of sample** | **What are the important characteristics of the sample? e.g. demographic data, date** | **Professional in the field of programming and policy making Non-communicable disease** |
| **Data collection** | | | |
| **17** | **Interview guide** | **Were questions, prompts, guides provided by the authors? Was it pilot tested?** | **yes** |
| **18** | **Repeat interviews** | **Were repeats inter views carried out? If yes, how many?** | **no** |
| **19** | **Audio/visual recording** | **Did the research use audio or visual recording to collect the data?** | **audio** |
| **20** | **Field notes** | **Were field notes made during and/or after the interview or focus group?** | **after the inter view** |
| **21** | **Duration** | **What was the duration of the inter views or focus group?** | **45 to 60 minutes** |
| **22** | **Data saturation** | **Was data saturation discussed?** | **Yes** |
| **23** | **Transcripts returned** | **Were transcripts returned to participants for comment and/or correction?** | **yes** |
| **Domain 3: analysis and findings** | | | |
| **Data analysis** | | | |
| **24** | **Number of data coders** | **How many data coders coded the data?** | **two researchers** |
| **25** | **Description of the coding tree** | **Did authors provide a description of the coding tree?** | **yes** |
| **26** | **Derivation of themes** | **Were themes identified in advance or derived from the data?** | **derived from the data** |
| **27** | **Software** | **What software, if applicable, was used to manage the data?** | **code extraction was done manually** |
| **28** | **Participant checking** | **Did participants provide feedback on the findings?** | **yes** |
| **reporting** | | | |
| **29** | **Quotations presented** | **Were participant quotations presented to illustrate the themes/findings? Was each quotation identified? e.g. participant number** | **yes** |
| **30** | **Data and finding consistent** | **Was there consistency between the data presented and the findings?** | **yes** |
| **31** | **Clarity of major themes** | **Were major themes clearly presented in the findings?** | **yes** |
| **32** | **Clarity of minor themes** | **Is there a description of diverse cases or discussion of minor themes?** | **yes** |
